# Supplementary material for: Does economic globalization affect government spending? A meta-analysis
Source: Springer Nature journal article supplement (doi:10.1007/s11127-020-00784-8), 2020-02-17
Supplement: MOESM1 [file 17716946]

**Online appendix to the paper:**

**“Does economic globalization affect government spending? A meta-analysis”**

**1. Distinguishing trade globalization, financial globalization and overall economic globalization**

The coding of the economic globalization indicators was based on the classification provided in Gräbner et al. (2018). We distinguish trade globalization indicators, financial globalization indicators, and overall economic globalization indicators.

Existing measures of economic globalization can be grouped according to the type of globalization – ‘trade’ or ‘financial’ – they aim to measure, and, second, according to the sources utilized in composing the globalization measure. These sources are either aggregate economic statistics (de-facto measures) or assessments of the institutional foundations of economic globalization, i.e. the legally established barriers to trade and financial transactions (de-jure measures).

Overall economic globalization measures aim to incorporate information on both, real and financial aspects.

|                                                                                  | <b>Evaluation of economic globalization with regard to real flows (goods and services)</b>                            | <b>Evaluation of economic globalization with regard to financial flows</b>                                                          | <b>Overall economic globalization measures</b>          |
|----------------------------------------------------------------------------------|-----------------------------------------------------------------------------------------------------------------------|-------------------------------------------------------------------------------------------------------------------------------------|---------------------------------------------------------|
| <b>Evaluation of outcomes: De-facto measures of economic globalization</b>       | De facto measures of trade globalization, for example: <i>total imports</i> or <i>total exports (relative to GDP)</i> | De facto measures of financial globalization, for example: <i>FDI inward/outward</i> or <i>foreign financial assets/liabilities</i> | <b>Measures integrating trade and financial aspects</b> |
|                                                                                  | Hybrid measures for de-facto globalization                                                                            |                                                                                                                                     |                                                         |
| <b>Evaluation of legal framework: De-jure measures of economic globalization</b> | De jure measures of trade globalization, for example: <i>tariff rates</i> or <i>non-tariff trade barriers</i>         | De jure measures of financial globalization, for example: <i>FDI restrictions</i> or <i>capital account restrictions</i>            |                                                         |
|                                                                                  | Hybrid measures for de-jure globalization                                                                             |                                                                                                                                     |                                                         |

Table: Types of economic globalization indicators.

De-facto measures are outcome-oriented indicators, reflecting a country’s actual degree of integration into the world economy. De-jure measures, on the other hand, are based upon an evaluation of a country’s legal framework: they reflect a country’s willingness to be open as expressed by the prevailing regulatory environment. Typically, de-jure

measures on trade are based on tariff rates (such as duties and surcharges), information on non-tariff trade barriers (such as licensing rules and quotas) or tax revenues emerging from trade activities relative to GDP. Financial de-jure measures indicate the extent to which a country imposes legal restrictions on its cross-border capital transactions. As de-jure indicators evaluate a country's regulatory environment, it is important to keep in mind that this environment is influenced not only by national policies; they are also shaped by the impact of supranational institutions like the European Union or the World Trade Organization.

For a more detailed exposition of the trade globalization, financial globalization and overall economic globalization indicators used in the empirical literature, see Gräbner et al. (2018).

## Reference

Gräbner, C.; Heimberger, P.; Kapeller, J.; Springholz, F. (2018): Measuring economic openness: A review of existing measures and empirical practices, ICAE Working Paper No. 86.

## 2. Studies included in the meta-analysis

Below, we show a table consisting of all the studies that were included in the meta-analysis based on the criteria discussed in the paper (see section 3.1).

**Table: Peer-reviewed papers included in the meta-analysis (n=79)**

|                               |                                            |                              |
|-------------------------------|--------------------------------------------|------------------------------|
| Adam and Kammas (2007)        | Garrett (2001)                             | Mourao (2011)                |
| Alesina and Wacziarg (1998)   | Gemmel et al. (2008)                       | Musau (2018)                 |
| Amable et al. (2006)          | Gizelis (2005)                             | Nooruddin and Simmons (2009) |
| Annett (2001)                 | Gürkan Yay and Aksoy (2018)                | Onaran and Bösch (2014)      |
| Ashraf et al. (2017)          | Ha (2008)                                  | Pampel and Williamson (1988) |
| Avelino et al. (2005)         | Ha (2015)                                  | Potrafke (2011)              |
| Balle and Vaidja (2005)       | Hausken et al. (2004)                      | Profeta et al. (2013)        |
| Benarroch and Pandey (2008)   | Hays et al. (2005)                         | Quinn (1997)                 |
| Benarroch and Pandey (2012)   | Hicks and Swank (1992)                     | Ram (2009)                   |
| Blais et al. (1993)           | Huber and Stephens (2000)                  | Razin et al. (2002)          |
| Brady and Lee (2014)          | Huber et al. (2008)                        | Remmer (2004)                |
| Brady et al. (2005)           | Iversen and Cusack (2000)                  | Rodrik (1998)                |
| Bretschger and Hettich (2002) | Jahn (2006)                                | Rudra (2002)                 |
| Brown and Hunter (2004)       | Jeanneney and Hua (2004)                   | Rudra and Haggard (2005)     |
| Burgoon (2001)                | Jensen (2010)                              | Rodden (2003)                |
| Busemeyer (2009)              | Jin and Zhou (2002)                        | Sanz and Velasquez (2007)    |
| Castles (2001)                | Kaufman and Segura-Ubierno (2001)          | Shelton (2007)               |
| Chuaire et al. (2017)         | Kim et al. (2013)                          | Shelton (2008)               |
| Crepaz and Moser (2004)       | Kimakova (2009)                            | Skidmore et al. (2004)       |
| Cusack (1997)                 | Kittel and Obinger (2003)                  | Stein (1999)                 |
| Dreher (2006)                 | Kittel and Winner (2005)                   | Swank (2001)                 |
| Dreher et a. (2008b)          | Kwon and Pontusson (2010)                  | Wibbels (2006)               |
| Epifani and Gancia (2009)     | Lane (2003)                                | Wong (2016)                  |
| Ferris (2003)                 | Leibrecht et al. (2011)                    | Wu and Lin (2012)            |
| Fiva (2006)                   | Martin-Mayoral and Fernandez-Sastre (2017) | Zakaria and Shakoob (2011)   |
| Garen and Trask (2005)        | Marshall and Fisher (2015)                 |                              |
| Garrett (1995)                | Meinhard and Potrafke (2012)               |                              |

Notes: Studies published in peer-reviewed journals prior to October 2018 were included. Criteria of inclusion are described in the text.

## References

- Adam, A.; Kamas, P. (2007): Tax policies in a globalized world: Is it politics after all?, *Public Choice*, 133(3-4), 321-341.
- Alesina, A.; Wacziarg, R. (1998): Openness, country size and government, *Journal of Public Economics*, 69(3), 305-321.
- Amable, B.; Gatti, D.; Schumacher, J. (2006): Welfare-state retrenchment: the partisan effect revisited, *Oxford Review of Economic Policy*, 22(3), 426-444.
- Annett, A. (2001): Social Fractionalization, Political Instability, and the Size of Government, *IMF Staff Papers*, 48(3), 561-592.
- Ashraf, A.; Herzer, D.; Nunnenkamp, P. (2017): Greenfield FDI, Cross-Border M&As, and Government Size, *Journal of International Trade & Economic Development*, 26(5), 566-584.
- Avelino, G.; Brown, D.; Hunter, W. (2005): The Effects of Capital Mobility, Trade Openness, and Democracy on Social Spending in Latin America, 1980-1999, *American Journal of Political Science*, 49(3), 625-641.
- Balle, F.; Vaidya, A. (2002): A Regional Analysis of Openness and Government Size, *Applied Economics Letters*, 9(5) 289-292.
- Bennaroch, M.; Pandey, M. (2008): Trade openness and government size, *Economics Letters*, 101(3), 157-159.
- Bennaroch, M.; Pandey, M. (2012): The relationship between trade openness and government size: Does disaggregating government expenditure matter?, *Journal of Macroeconomics*, 34(1), 239-252.
- Blais, A.; Blake, D.; Dion, S. (1993): Do Parties Make a Difference? Parties and the Size of Government in Liberal Democracies, *American Journal of Political Science*, 37(1), 40-62.
- Brady, D.; Beckfield, J.; Seeleib-Kaiser, M. (2005): Economic Globalization and the Welfare State in Affluent Democracies, 1975-2001, *American Sociological Review*, 70(6), 921-948.
- Brady, D.; Lee, J. (2014): The rise and fall of government spending in affluent democracies, 1971-2008, *Journal of European Social Policy*, 24(1), 56-79.
- Bretschger, L.; Hettich, F. (2002): Globalisation, capital mobility and tax competition: theory and evidence for OECD countries, *European Journal of Political Economy*, 18(4), 695-716.
- Brown, D.; Hunter, W. (2004): Democracy and human capital formation: Education spending in Latin America, *Comparative Political Studies*, 37(7), 842-864.
- Burgoon, B. (2001): Globalization and welfare compensation: Disentangling the ties that bind, *International Organization*, 55(3), 509-551.
- Bussemeyer, M. (2009): From myth to reality: Globalisation and public spending in OECD countries revisited, *European Journal of Political Research*, 48(4), 455-482.
- Castles, F. (2001): On the Political Economy of Recent Public Sector Development, *Journal of European Social Policy*, 11(3), 195-211.
- Chuaire, M.; Scartascini, C.; Tommasi, M. (2017): State capacity and the quality of policies: Revisiting the relationship between openness and government size, *Economics*

and Politics, 29(2), 133-156.

Crepaz, M.; Moser, A. (2004): The impact of collective and competitive veto points on public expenditures in the global age, *Comparative Political Studies*, 37(3), 259-285.

Cusack, T. (1997): Partisan politics and public finance: Changes in public spending in the industrialized democracies, 1955-1989, *Public Choice*, 91(3-4), 375-395.

Dreher, A. (2006): The influence of globalization on taxes and social policy: An empirical analysis for OECD countries, *European Journal of Political Economy*, 22(1), 179-201.

Dreher, A.; Gaston, N.; Martens, P. (2008a): *Measuring Globalisation. Gauging Its Consequences*, New York: Springer.

Dreher, A.; Sturm, J.; Ursprung, H. (2008b): The impact of globalization on the composition of government expenditures: Evidence from panel data, *Public Choice*, 134(3-4), 263-292.

Epifani, P.; Gancia, G. (2009): Openness, government size and the terms of trade, *Review of Economic Studies*, 76(2), 629-668.

Ferris, S. (2003): Do alternative measures of government result in alternative explanations for government size?, *Economics Bulletin*, 8(4), 1-11.

Fiva, J. (2006): New Evidence on the Effect of Fiscal Decentralization on the Size and Composition of Government Spending, *Public Finance Analysis*, 62(2), 250-280.

Garen, J.; Trask, K. (2005): Do More Open Economies Have Bigger Governments? Another Look, *Journal of Development Economics*, 77(2), 533-551.

Garrett, G. (1995): Capital Mobility, Trade, and the Domestic Politics of Economic Policy, *International Organization*, 49(4), 657-687.

Garrett, G. (2001): Globalization and Government Spending Around the World, *Studies in Comparative International Development*, 35(4), 3-29.

Gemmel, M.; Kneller, R.; Sanz, I. (2008): Foreign Investment, International Trade and the Size and Structure of Public Expenditures, *European Journal of Political Economy*, 24(1), 151-171.

Gizelis, T. (2005): Globalization, integration, and the European Welfare State, *International Interactions*, 31(2), 139-162.

Gürkan Yay, G.; Aksoy, T. (2018): Globalization and the welfare state, *Quality and Quantity*, 52(3), 1015-1040.

Ha, E. (2008): Globalization, Veto Players, and Welfare Spending, *Comparative Political Studies*, 41(6), 783-813.

Ha, E. (2015): The impact of democracy, government ideology, and globalization on social spending in less developed countries, *International Journal of Comparative Sociology*, 56(5), 338-365

Hausken, K.; Martin, C.; Plümer, T. (2004): Government Spending and Taxation in Democracies and Autocracies, *Constitutional Political Economy*, 15(3), 239-259.

Hays, J.; Ehrlich, S.; Peinhardt, C. (2005): Government Spending and Public Support for Trade in the OECD: An Empirical Test of the Embedded Liberalism Thesis, *International Organization*, 59(2), 473-494

- Hicks, A.; Swank, D. (1992): Politics, Institutions, and Welfare Spending in Industrialized Democracies, 1960-82, *The American Political Science Review*, 86(3), 658-674.
- Huber, E.; Stephens, J. (2000): Partisan Governance, Women's Employment, and the Social Democratic Service State, *American Sociological Review*, 65(3), 323-342.
- Huber, E.; Mustillo, T.; Stephens, J. (2008): Politics and Social Spending in Latin America, *The Journal of Politics*, 70(2), 420-436.
- Iversen, T.; Cusack, T. (2000): The causes of welfare state expansion: deindustrialization or globalization?, *World Politics*, 52(3), 313-349.
- Jahn, D. (2006): Globalization as 'Galton's Problem': The Missing Link in the Analysis of Diffusion Patterns in Welfare State Development, *International Organization*, 60(2), 401-431.
- Jeanneney, S.; Hua, P. (2004): Why do more open Chinese provinces have bigger governments?, *Review of International Economics*, 12(3), 525-542.
- Jensen, C. (2010): Issue compensation and right-wing government social spending, *European Journal of Political Research*, 49(2), 282-299.
- Jin, J.; Zou, H. (2002): How does fiscal decentralization affect aggregate, national, and subnational government size?, *Journal of Urban Economics*, 52(2), 270-293.
- Kaufman, R.; Segura-Ubierno, A. (2001): Globalization, Domestic Politics, and Social Spending in Latin America: A Time-Series Cross-Section Analysis, 1973-1997, *World Politics*, 53(4), 553-587.
- Kimakova, A. (2009): Government size and openness revisited: the case of financial globalization, *Kyklos*, 62(3), 394-406.
- Kim, H.; Lee, S.; Lee, C. (2013): Can the welfare state be enhanced with higher corporate tax in an era of trade liberalization?, *Journal of Economic Research*, 18(2), 147-162.
- Kittel, B.; Obinger, H. (2003): Political parties, institutions, and the dynamics of social expenditure in times of austerity, *Journal of European Public Policy*, 10(1), 20-45.
- Kittel, B.; Winner, H. (2005): How reliable is pooled analysis in political economy? The globalization-welfare state nexus revisited, *European Journal of Political Research*, 44(2), 269-293.
- Kwon, H.; Pontusson, J. (2010): Globalization, labour power and partisan politics revisited, *Socio-Economic Review*, 8(2), 251-281.
- Lane, P. (2003): The cyclical behavior of fiscal policy: evidence from the OECD, *Journal of Public Economics*, 87(12), 2661-2675.
- Leibrecht, M.; Klien, M.; Onaran, O. (2011): Globalization, Welfare Regimes and Social Protection Expenditures in Western and Eastern European Countries, *Public Choice*, 148(3-4), 569-594.
- Marshall, J.; Fisher, S. (2015): Compensation or constraint? How different compositions of economic globalization affect government spending and electoral turnout, *British Journal of Political Science*, 45(2), 353-389.
- Martin-Mayoral, F.; Fernandez Sastre, J. (2017): Determinants of social spending in Latin America during and after the Washington consensus: a dynamic panel error-correction model analysis, *Latin American Economic Review*, 26(1), 1-32.

- Meinhard, S.; Potrafke, N. (2012): The Globalization-Welfare State Nexus Reconsidered, *Review of International Economics*, 20(2), 271-287.
- Mourao, P. (2011): Has Trade Openness Already Voted? A Panel Data Study, *Emerging Markets Finance and Trade*, 47(5), 53-71.
- Musau, A. (2018): A Replication Study of “Openness, Country Size and Government Size” (Journal of Public Economics 2009), *Public Finance Review*, forthcoming, doi: <https://doi.org/10.1177/1091142118765786>
- Nooruddin, I.; Simmons, J. (2009): Openness, uncertainty, and social spending: Implications for the globalization-welfare state debate, *International Studies Quarterly*, 53(3), 841-866.
- Onaran, Ö.; Boesch, V. (2014): The Effect of Globalization on the Distribution of Taxes and Social Expenditures in Europe: Do Welfare State Regimes Matter?, *Environment and Planning A: Economy and Space*, 46(2), 373-397.
- Pampel, F.; Williamson, J. (1988): Welfare Spending in Advanced Industrial Democracies, 1950-1980, *American Journal of Sociology*, 93(6), 1424-1456.
- Potrafke, N. (2011): Does government ideology influence budget composition? Empirical evidence from OECD countries, *Economics of Governance*, 12(2), 101-134.
- Potrafke, N. (2015): The Evidence on Globalisation, *The World Economy*, 38(3), 509-552.
- Profeta, P.; Puglisi, R.; Scabrosetti, S. (2013): Does democracy affect taxation and government spending? Evidence from developing countries, *Journal of Comparative Economics*, 41(3), 684-718.
- Quinn, D. (1997): The correlates of change in international financial regulation, *American Political Science Review*, 91(3), 531-551.
- Ram, R. (2009): Openness, Country Size, and Government Size: Additional Evidence from a Large Cross-country Panel, *Journal of Public Economics*, 93(1-2), 213-218.
- Razin, A.; Sadka, E.; Swagel, P. (2002): The Aging Population and the Size of the Welfare State, *Journal of Political Economy*, 110(4), 900-918.
- Remmer, K. (2004): Does Foreign Aid Promote the Expansion of Government?, *American Journal of Political Science*, 48(1), 77-92.
- Rodden, J. (2003): Reviving Leviathan: Fiscal Federalism and the Growth of Government, *International Organization*, 57(4), 695-729.
- Rodrik, D. (1998): Why do More open Economies Have Bigger Governments?, *Journal of Political Economy*, 106(5), 997-1032.
- Rudra, N. (2002): Globalization and the Decline of the Welfare State in Less-Developed Countries, 56(2), 411-445.
- Rudra, N.; Haggard, S. (2005): Globalization, democracy, and effective welfare spending in the developing world, *Comparative Political Studies*, 38(9), 1015-1049.
- Sanz, I.; Velasquez, F. (2007): The role of ageing in the growth of government and social welfare spending in the OECD, *European Journal of Political Economy*, 23(4), 917-931.
- Shelton, C. (2007): The size and composition of government expenditure, *Journal of Public Economics*, 91(11-12), 2230-2260.
- Shelton, C. (2008): the aging population and the size of the welfare state: Is there a

puzzle?, *Journal of Public Economics*, 92(3-4), 647-651.

Skidmore, M.; Toya, H.; Merriman, D. (2004): Convergence in Government Spending: Theory and Cross-Country Evidence, *Kyklos*, 57(4), 587-620.

Stein, E. (1999): Fiscal decentralization and government size in Latin America, *Journal of Applied Economics*, 2(2), 357-391.

Steinmo, S. (2002): Globalization and Taxation: Challenges to the Swedish Welfare State, *Comparative Political Studies*, 35, 839-862.

Swank, D. (2001): Mobile capital, democratic institutions, and the public economy in advanced industrial societies, *Journal of Comparative Policy Analysis: Research and Practice*, 3(2), 133-162.

Wibbels, E. (2006): Dependency revisited: International markets, business cycles, and social spending in the developing world, *International Organization*, 60(2), 433-468.

Wong, M. (2016): Globalization, spending and income inequality in Asia Pacific, *Journal of Comparative Asian Development*, 15(1), 1-18.

Wu, A.; Lin, M. (2012): Determinants of government size: evidence from China, *Public Choice*, 151, 255-270.

Yoon, J. (2009): Globalization and the welfare state in developing countries, *Business and Politics*, 11(2), 1-31.

Zakaria, M.; Shakoor, S. (2011): Relationship Between Government Size and Trade Openness: Evidence from Pakistan, *Transition Studies Review*, 18(2), 328-341.

### **3. Meta-analysis: Descriptive statistics**

This section of the appendix reports descriptive statistics regarding the meta-study data used in the paper.

#### **3.1 How are partial correlations distributed?**

Figure A1 shows the distribution of globalization-government spending partial correlations in our meta-analysis data set. The minimum partial correlation coefficient is -0.71 and the maximum is 0.93; the standard deviation is 0.21. While the unweighted mean (0.05) and median (0.02) are positive but relatively small in terms of magnitude, Figure A1 reveals that there is clearly considerable dispersion in the results. We also conduct Cochran's Q-Test, which provides clear evidence that there is excess heterogeneity in the results beyond what could be expected by measured random sampling ( $p < 0.0001$ ).



**Figure A1: Distribution of partial correlations**

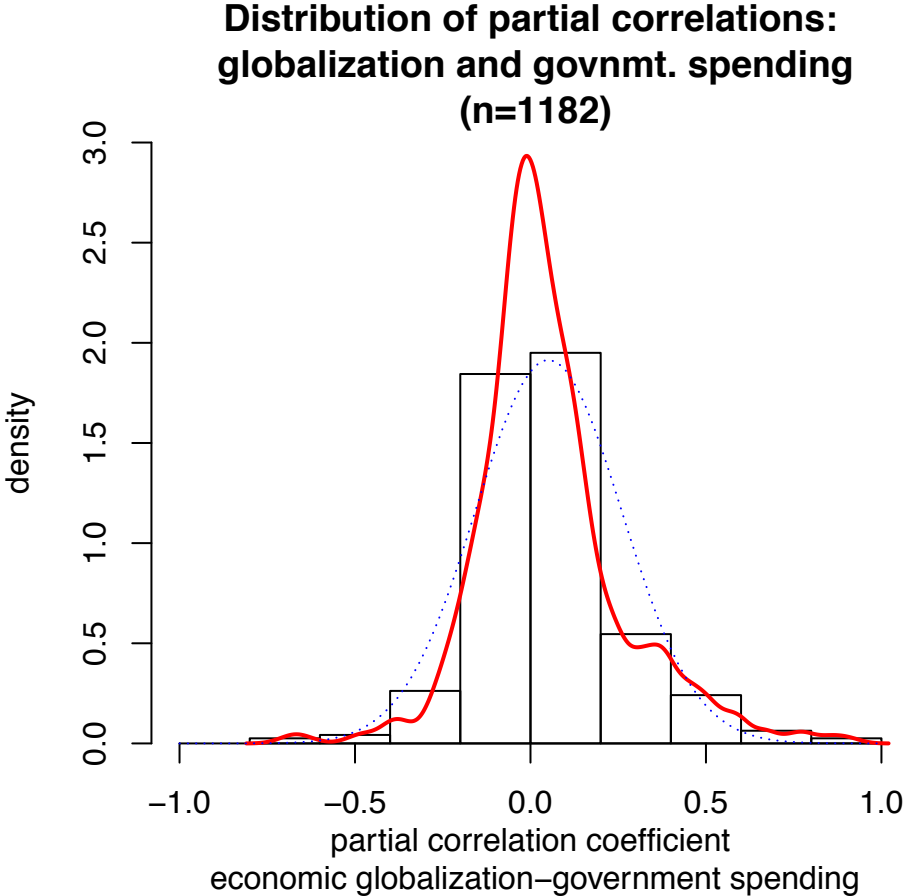

*Notes: The figure plots the distribution of partial correlation estimates (kernel density plot). The blue dotted curve represents a normal distribution.*

**3.2 Descriptive meta-analysis on the globalization-spending relationship**

By comprising all globalization-spending studies and by using precision-weights, the average globalization-spending estimate derived from the meta-analysis is arguably the best estimate of the entire empirical literature on the effect of globalization on government spending. Here, we report descriptive statistics uncorrected for publication selection bias.

Formally, the weighted average partial correlation can be written as:

$$wr = \frac{\sum[P_{ij}r_{ij}]}{\sum[P_{ij}]} \quad (3)$$

where  $r$  is the partial correlation coefficient as defined above from the  $i$ th regression estimate of the  $j$ th study, and  $P$  is the associated precision, where precision is measured as the inverse of the variance. This weighted partial correlation coefficient can be used to shed light on two questions. First, is the average impact of globalization on government spending positive, negative or inconclusive? Second, is the effect small or large? According to the guidelines derived by Doucouliagos (2011), a partial correlation can be considered to be small if its absolute value is less than 0.07, while 0.17 is considered to be moderate and 0.33 is large.

Table A1 shows summary results for the meta-analysis data by reporting the median, unweighted and weighted average globalization-spending partial correlations. Note that those results do not account for potential publication selection (see section 4 of the paper). Furthermore, we report results from estimating a Random Effects Model and Fixed Effects model.<sup>1</sup> In addition, we included credibility intervals and two sets of confidence intervals. Column (1) of Table A1 reports the results for the whole set of estimates ( $n=1182$ ). The results show that there is a small positive partial correlation between globalization on government spending. Although the average effects are quite small, the possibility of a negative average partial correlation is ruled out by the reported 95% confidence intervals (note again that we do not account for potential publication selection). However, it should be reemphasized that the positive effect is

---

<sup>1</sup> In Table A1, both the random effects models and the fixed effects models were specified without moderator variables.

small, which raises skepticism about claims regarding strong effects of globalization on public expenditures (see section 2.2 in the paper). As a sensitivity check, column (2) of Table A1 repeats the summary meta-analysis after removing the 10% of the smallest and highest partial correlation estimates. The results in column (2) are in substance very similar to those in column (1).

Average partial correlation estimates corrected for publication selection bias are presented in section 4 of the paper.

**Table A1: Published globalization-government spending effects (79 studies, 1182 estimates)**

| <b>Statistic</b>              | <b>All estimates</b> | <b>Excluding Top and Bottom 10%</b> |
|-------------------------------|----------------------|-------------------------------------|
| <i>Number of estimates</i>    | 1182                 | 946                                 |
| Median                        | 0.019                | 0.019                               |
| Unweighted average            | 0.051                | 0.038                               |
| Precision-weighted average    | 0.028                | 0.026                               |
| Weighted Average (RE)         | 0.041                | 0.028                               |
| Weighted average (FE)         | 0.023                | 0.026                               |
| Weighted Average (HS)         | 0.037                | 0.028                               |
| 95% Confidence Interval (RE)  | +0.030               | +0.022                              |
| 95% Confidence Interval (HS)  | +0.051               | +0.035                              |
| 95% Credibility Interval (HS) | +0.028               | +0.022                              |
| 95% Credibility Interval (FE) | +0.046               | +0.035                              |
| 95% Credibility Interval (RE) | -0.224               | -0.132                              |
| 95% Credibility Interval (FE) | +0.293               | +0.187                              |

*Notes: RE... Random Effects; FE... Fixed effects; HS... Hunter-Schmidt.*

**4. Does the time dimension play a role?**

In the meta-regression models (see Table 3 in the paper), the time dimension does not seem to be play an important role, since the MeanYearData variable turns out to be statistically insignificant. The question whether the time dimension matters, however, can be investigated in a more visual way. Figure 3 groups the observations according to the mean years of the underlying data samples into 50 equally sized bins. Crosses depict data bins, and the line drawn indicates the linear fit. It can be seen that no systematic relationship is evident, i.e., we see no evidence that the globalization-spending relationship has changed over time.

**Figure A2: Globalization-spending estimates over the time horizon**

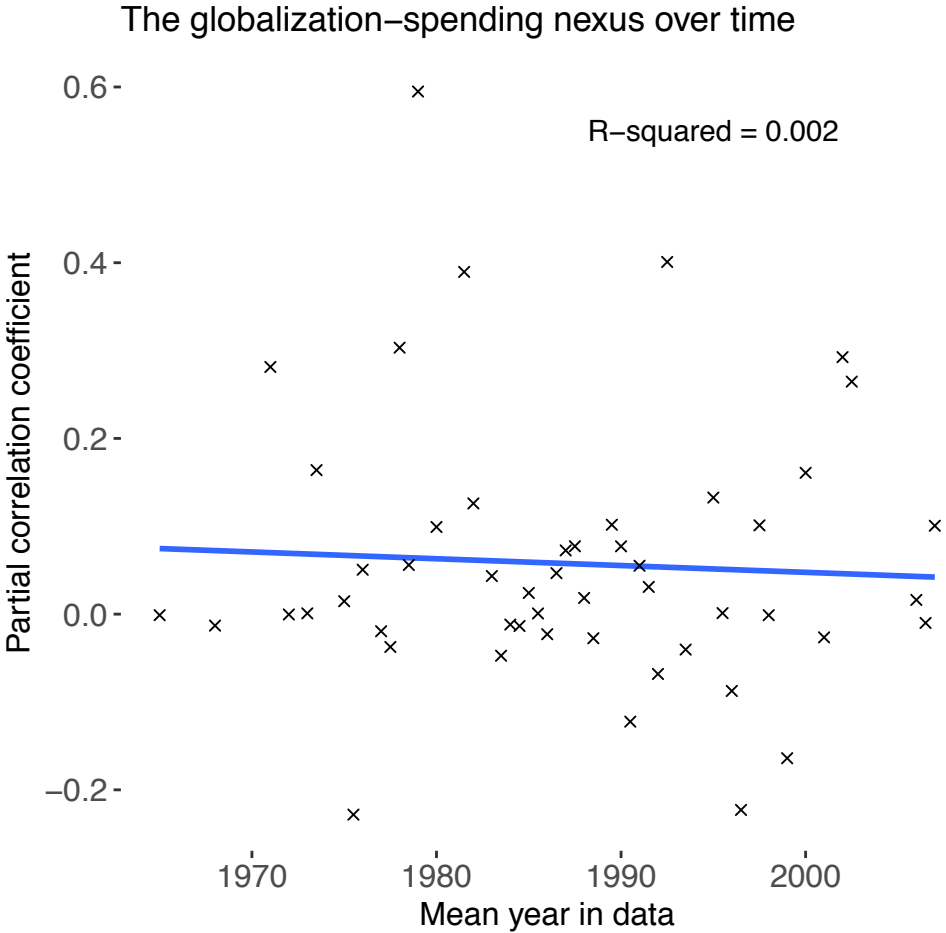

Notes: The figure shows the evolution of the partial correlation coefficient of the globalization-spending relationship over time. The graph groups the mean year of observation into 50 equally sized bins. Data bins are shown as crosses, the regression line indicates the linear fit.
